# Supplementary material for: Substance P induces fibrotic changes through activation of the RhoA/ROCK pathway in an in vitro human corneal fibrosis model
Source: PubMed Central journal article supplement (PMC6746877; doi:10.1007/s00109-019-01827-4), 2019-08-09

Full unedited gels for Figure 3C.

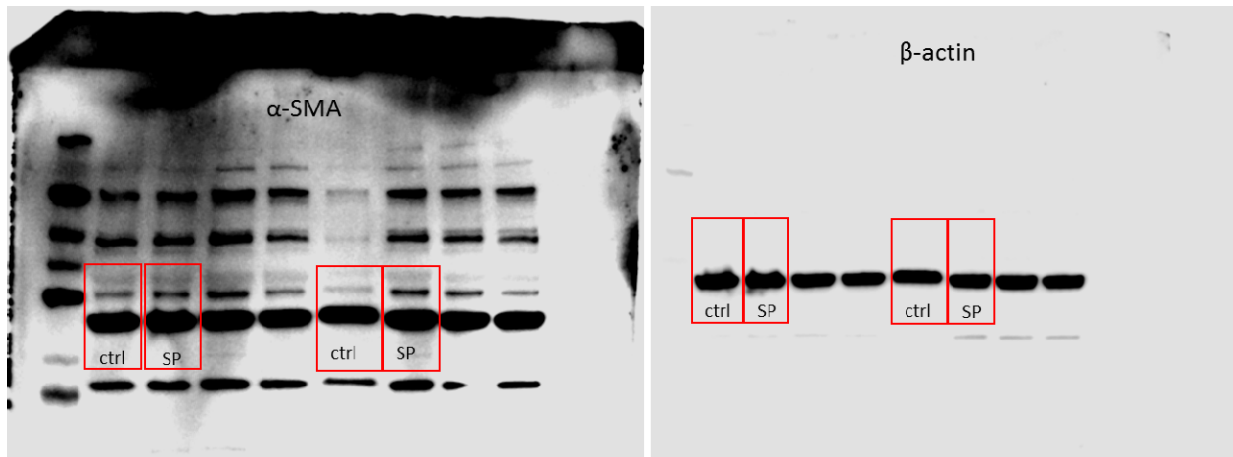

Full unedited gels for Figure 4D.

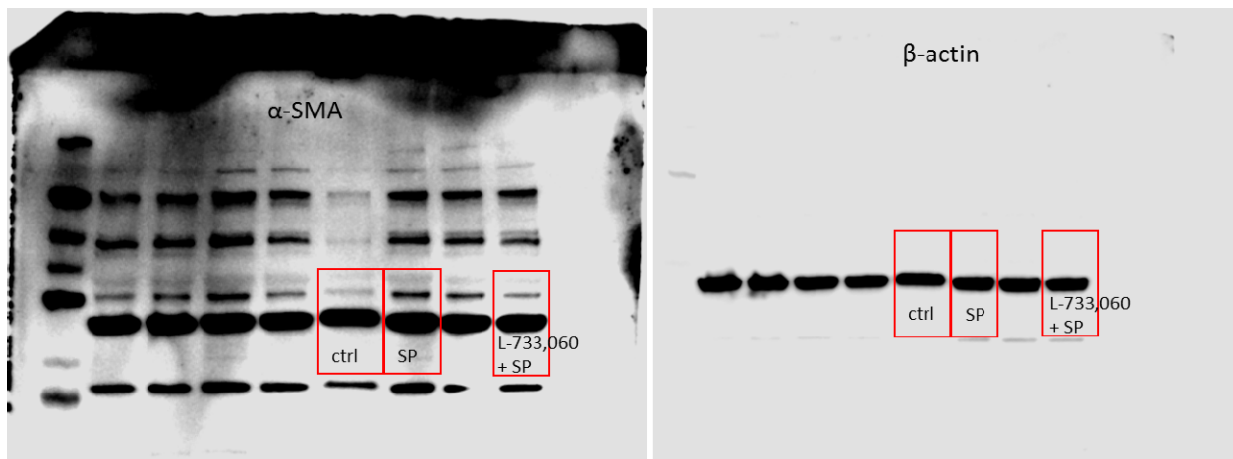

Full unedited gels for Figure 5C.

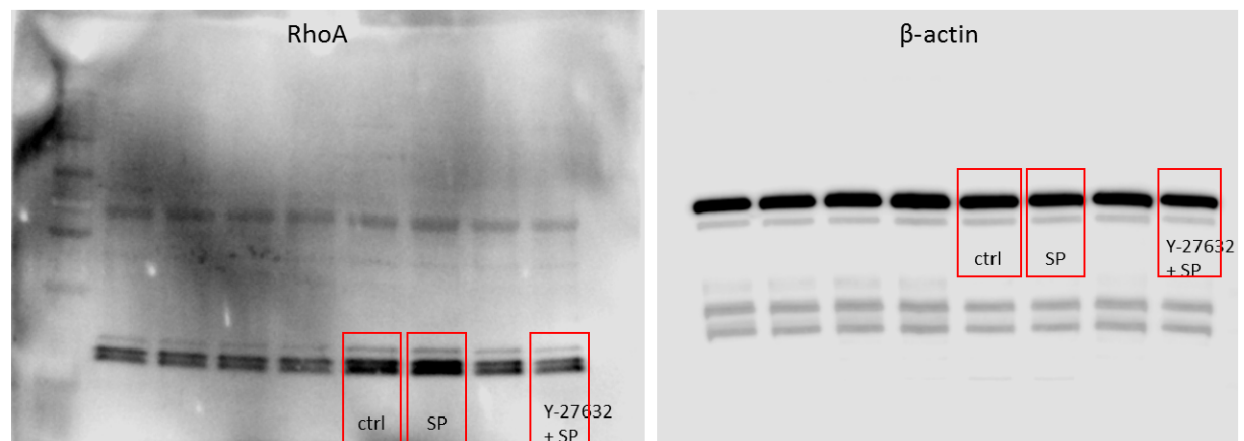

Full unedited gels for Figure 5D.

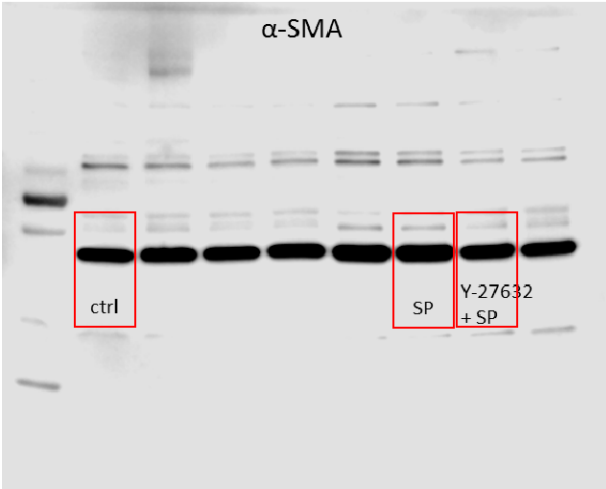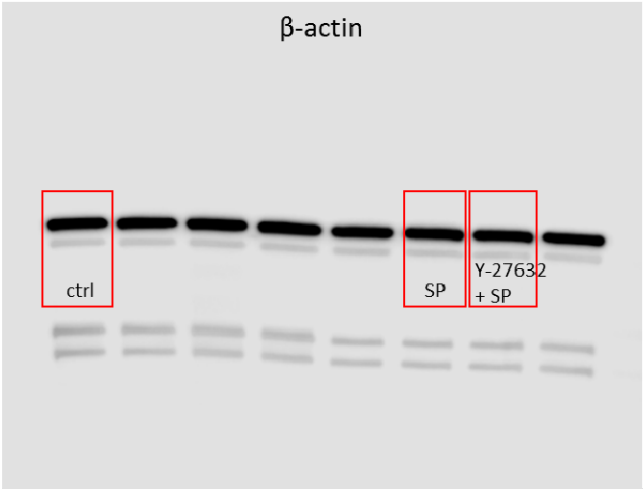

Supplement: 109_2019_1827_MOESM1_ESM.pdf [file 109_2019_1827_MOESM1_ESM.pdf]
